# Supplementary material
Source: PubMed Central journal article supplement (PMC3204016)

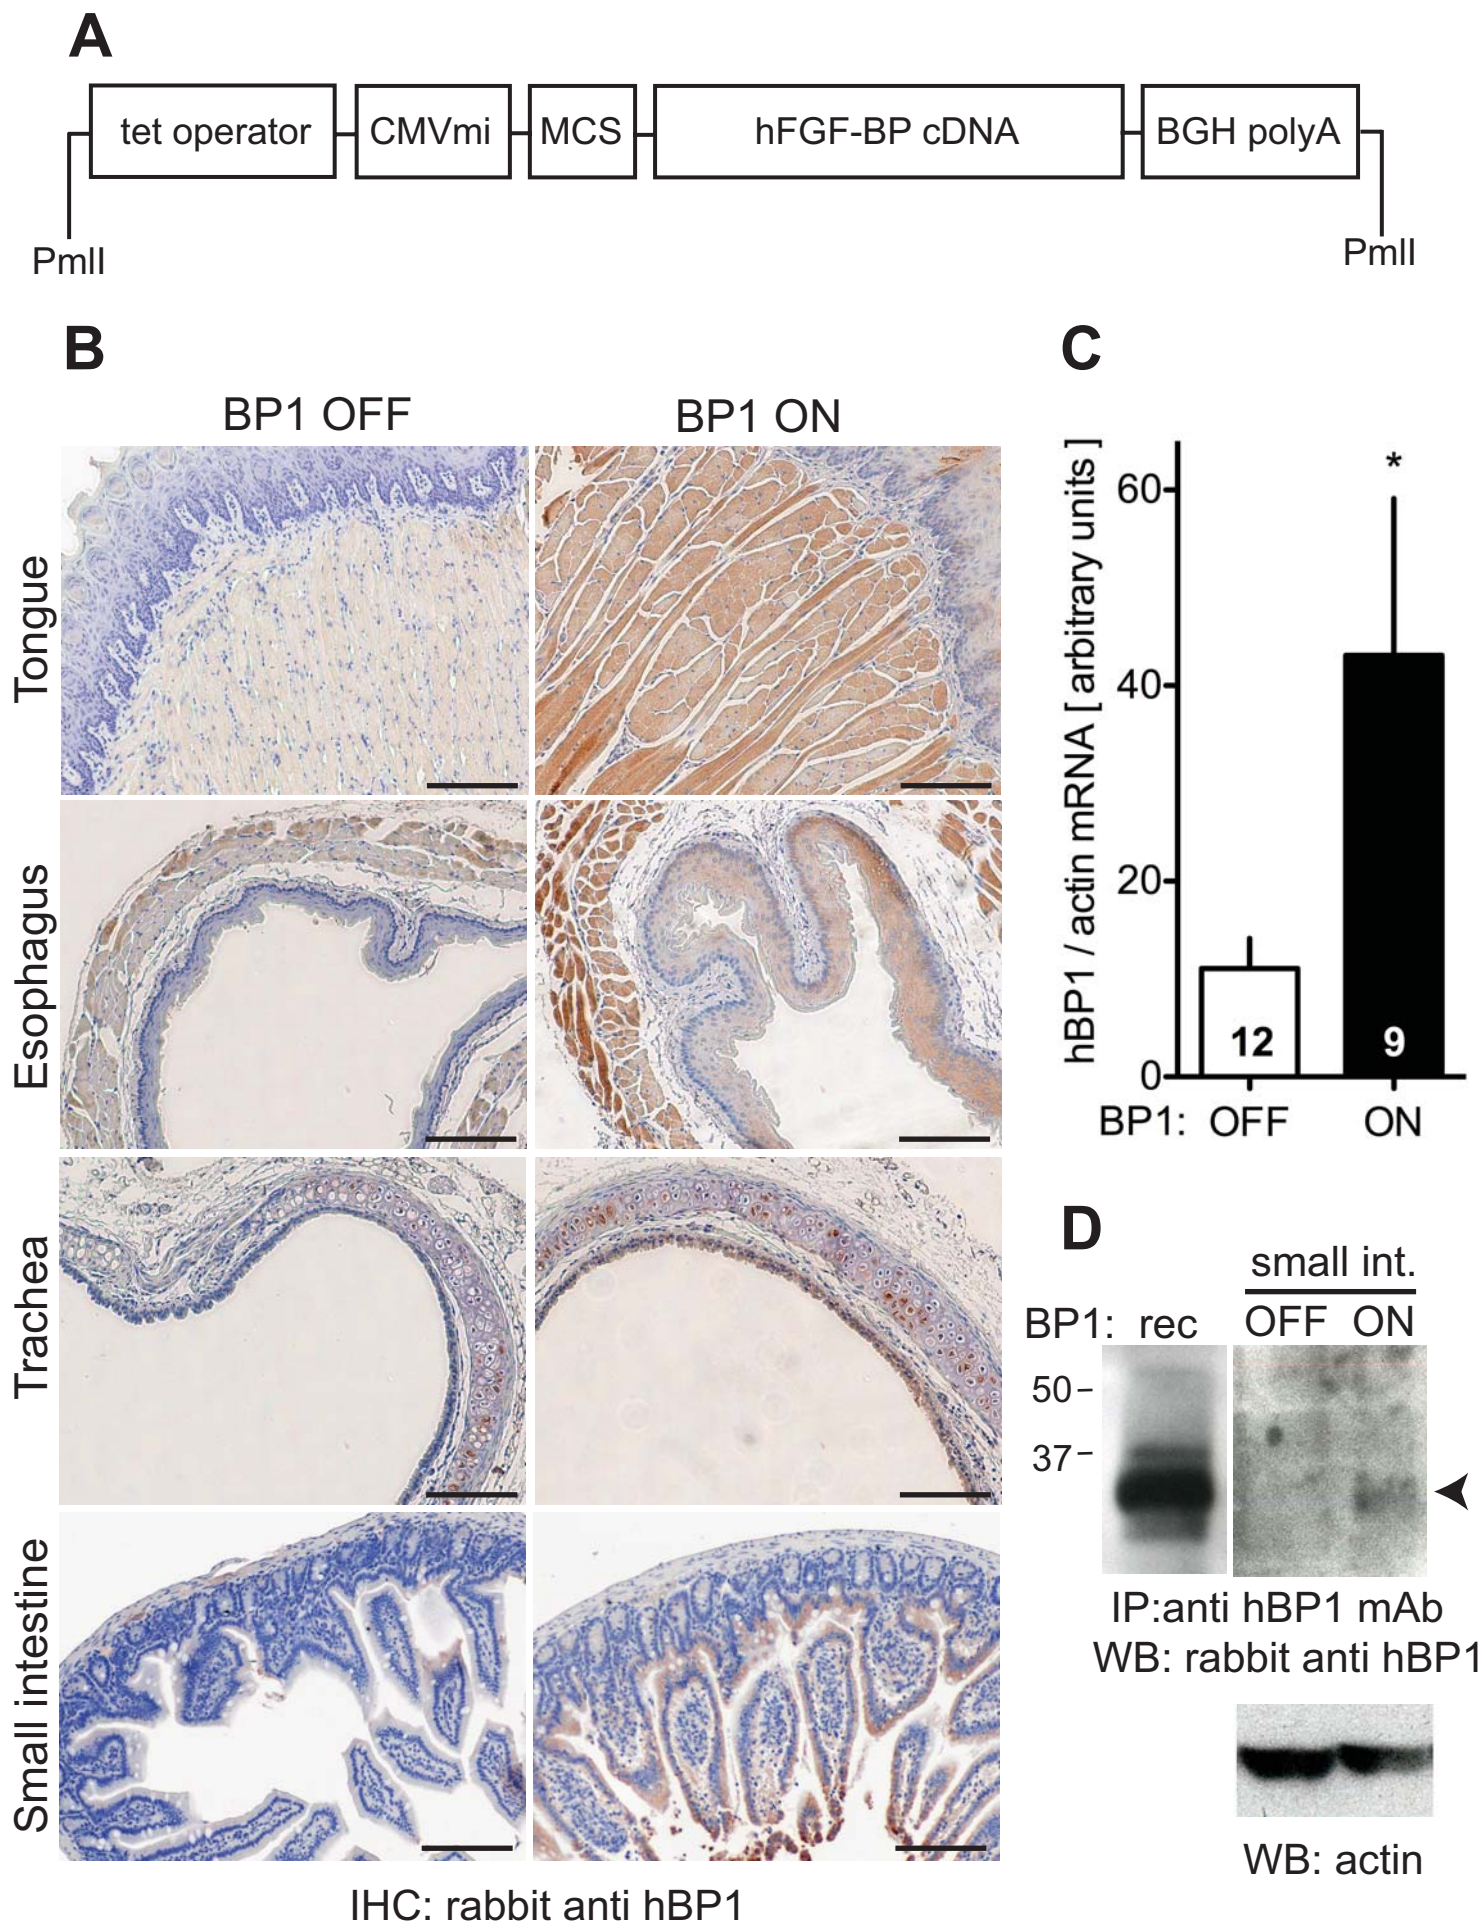

Supplement: mmc1.pdf [file mmc1.pdf]

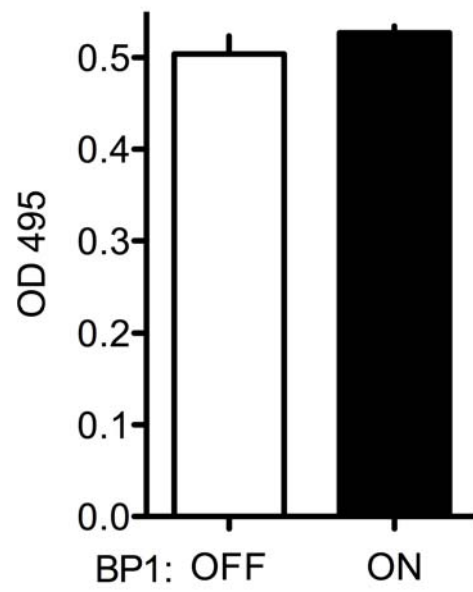

Tassi et al., Fig. S2

Supplement: mmc2.pdf [file mmc2.pdf]

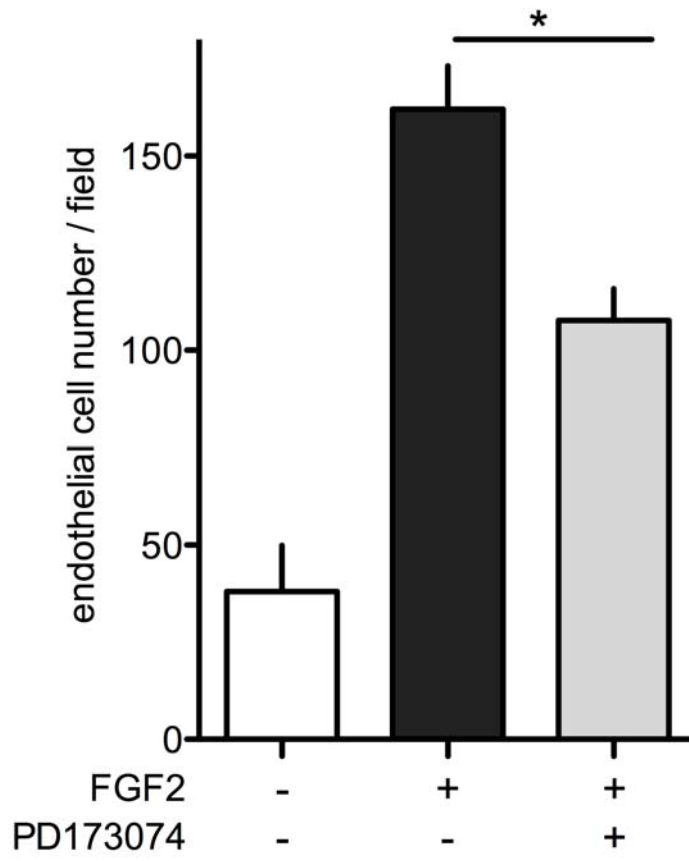

Tassi et al., Fig. S3

Supplement: mmc3.pdf [file mmc3.pdf]

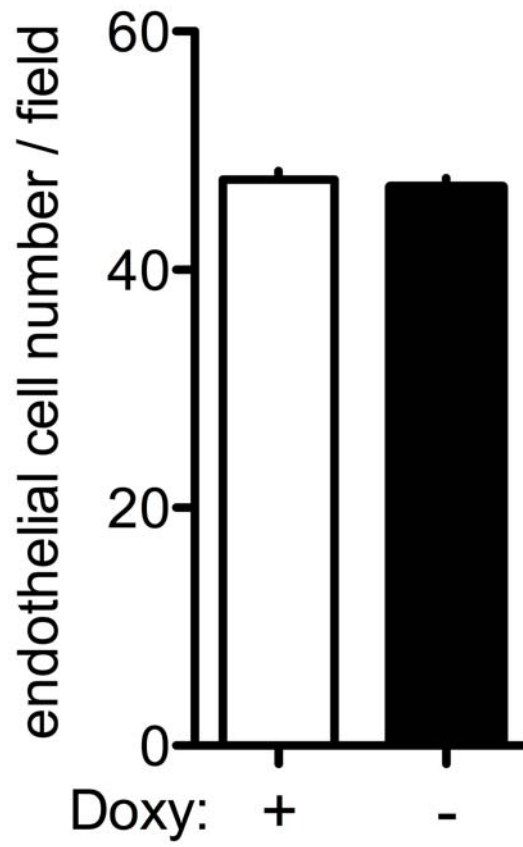

Tassi et al., Fig. S4

Supplement: mmc4.pdf [file mmc4.pdf]

BP1 OFF

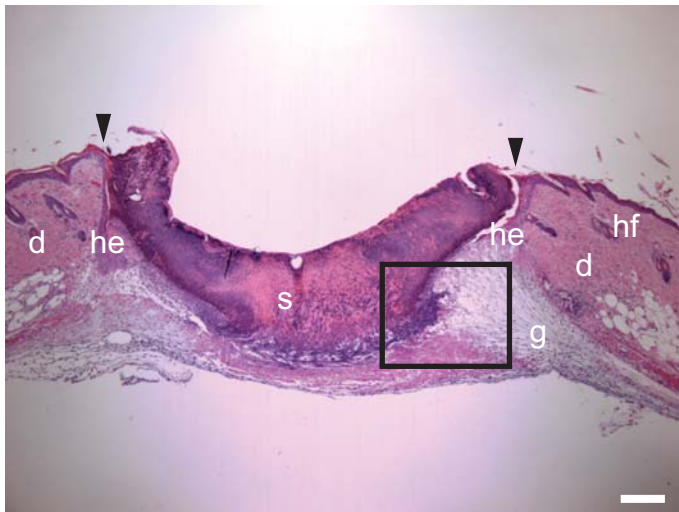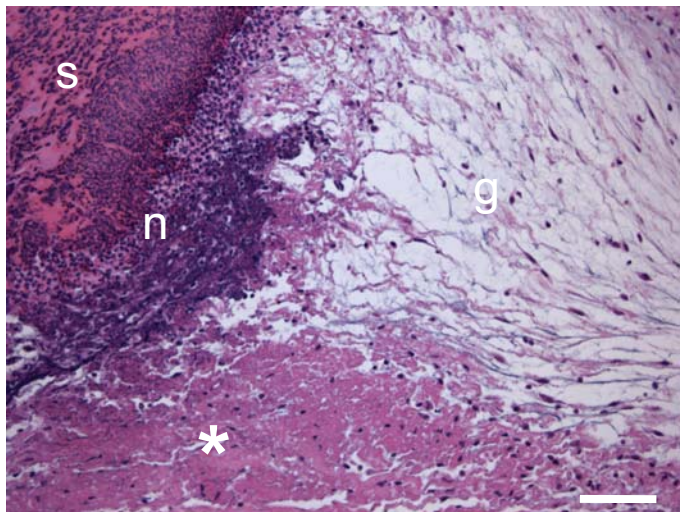

BP1 ON

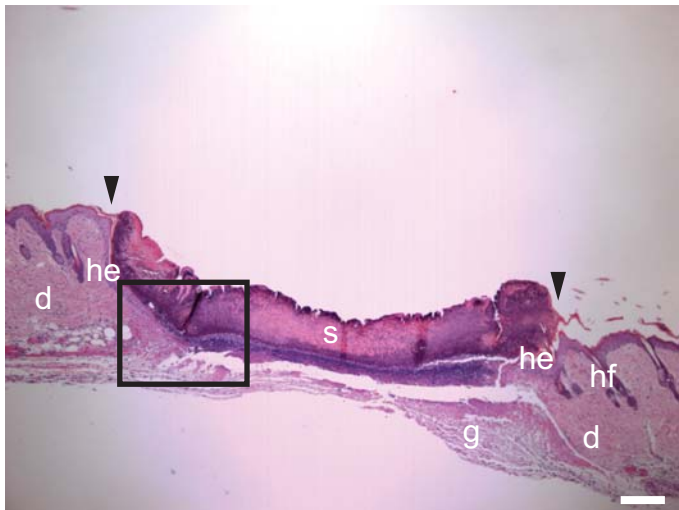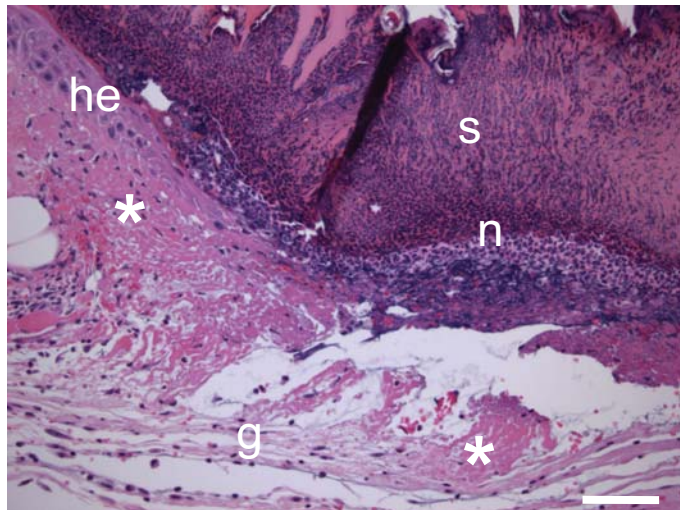

Tassi et al., Fig. S5

Supplement: mmc5.pdf [file mmc5.pdf]

+

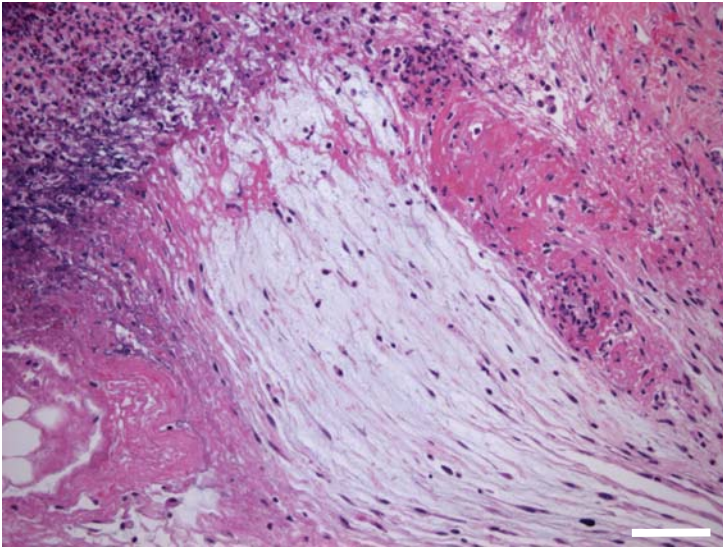

++

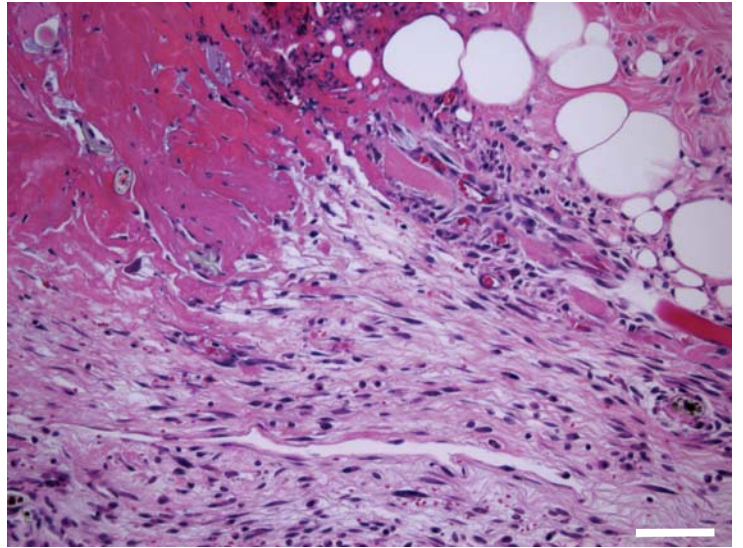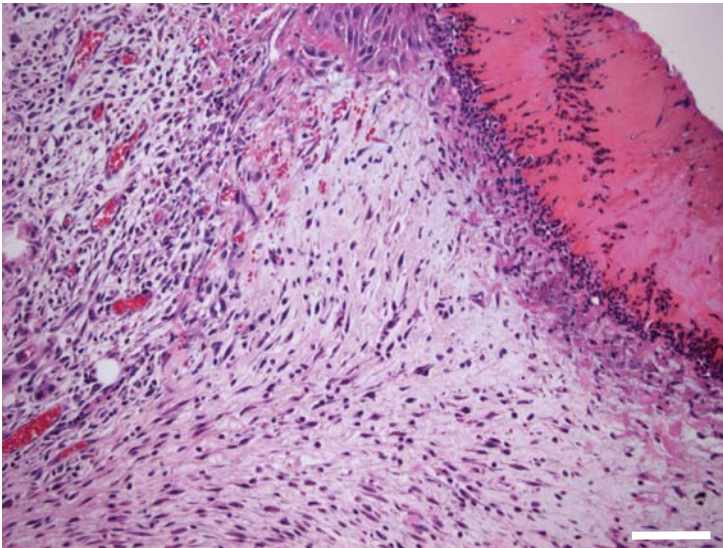

+++

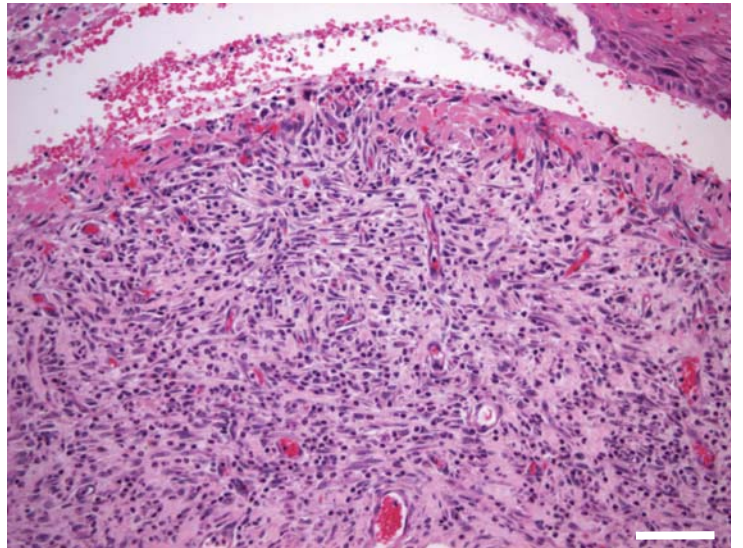

++++

Supplement: mmc6.pdf [file mmc6.pdf]

BP1 OFF

BP1 ON

H&E

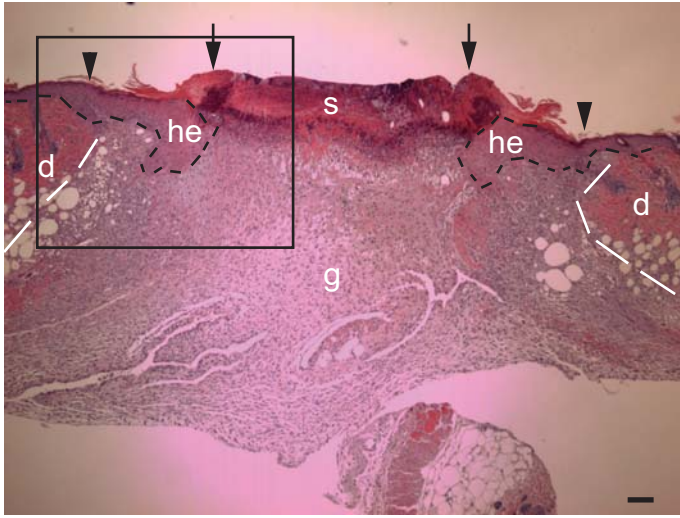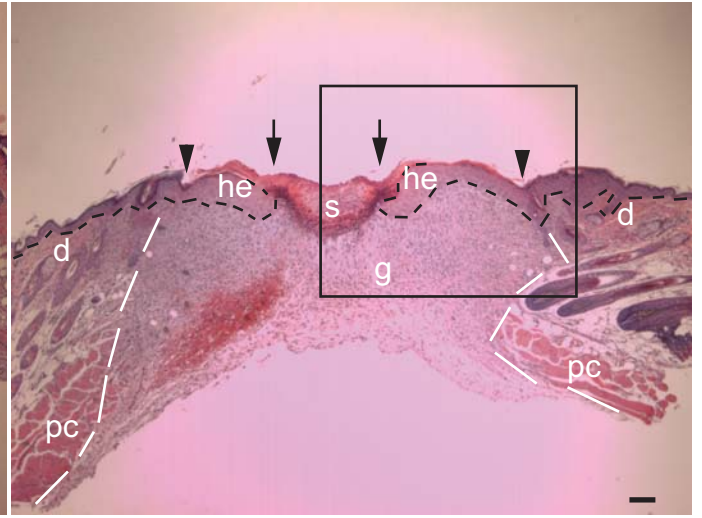

H&E

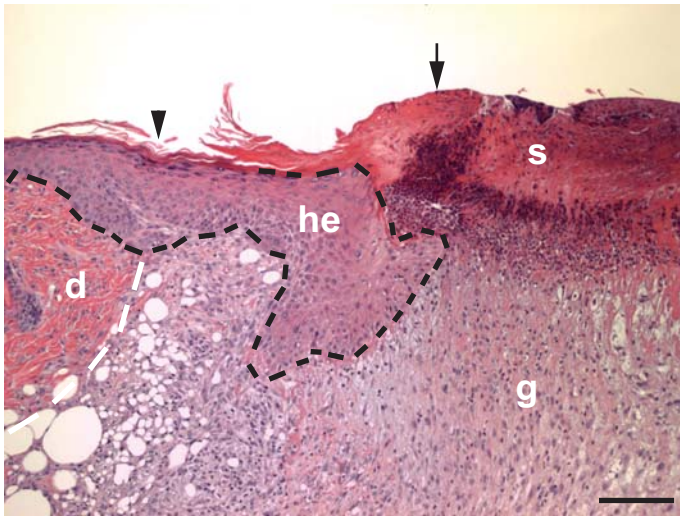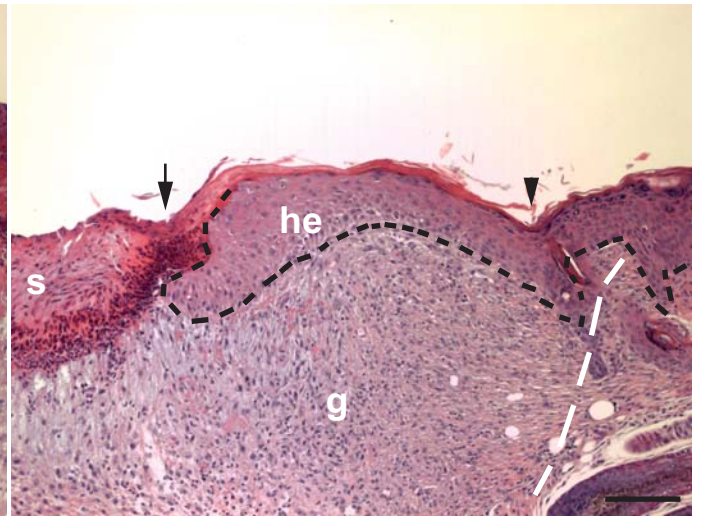

PCNA

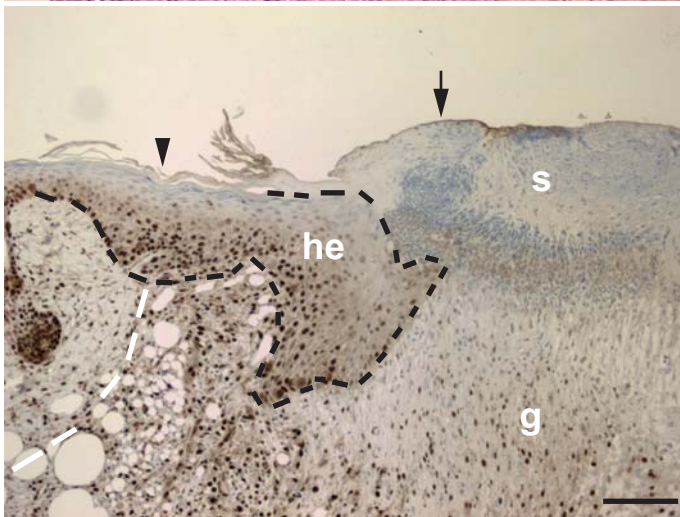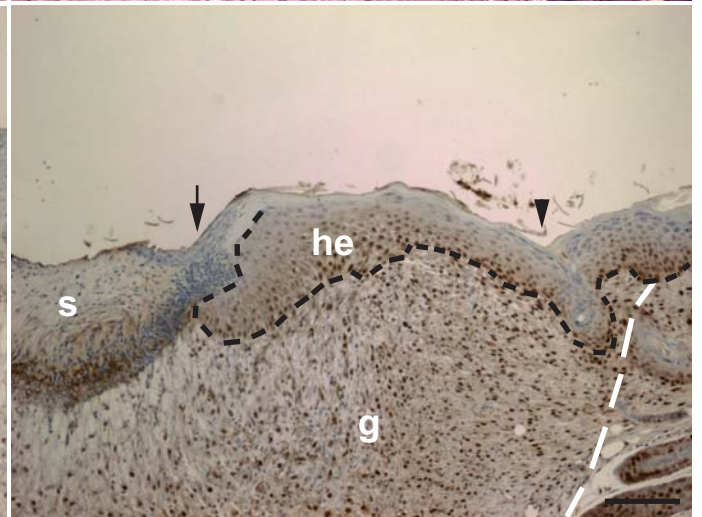

Supplement: mmc7.pdf [file mmc7.pdf]
